# Supplementary material
Source: HighWire-hosted journal article supplement (http://www.jrheum.org/highwire/filestream/32900/field_highwire_adjunct_files/0/170170_Data_Suppl.pdf)

## ONLINE SUPPLEMENTARY DATA

### Supplementary Table 1. Primer sequences for real-time PCR.

C3AR1-Forward : GTTCGTGTACCGGAAATCTT

C3AR1-Reverse : CAGGCGGCTGAACAATGTTT

CCL5- Forward : CCAGCAGTCGTCTTTGTAC

CCL5- Reverse : CTCTGGGTTGGCACACACTT

CCL7-Forward : GCACTTCTGTGTCTGCTGCT

CCL7-Reverse : AGCTCTCCAGCCTCTGCTTA

CCL8-Forward : TGGAGAGCTACACAAGAATCACC

CCL8-Reverse : TGGTCCAGATGCTTCATGGAA

CCR2-Forward : TGCAAAAAGCTGAAGTGCTTG

CCR2-Reverse : CAGCAGAGTGAGCCCACAAT

CXCL9-Forward : CCAGTAGTGAGAAAGGGTCGC

CXCL9-Reverse : AGGGCTTGGGGCAAATTGTT

CXCL10-Forward : GTGGCATTCAAGGAGTACCTC

CXCL10-Reverse : TGATGGCCTTCGATTCTGGATT

CCL11-Forward : CCCCTCAGCGACTAGAGAG

CCL11-Reverse : TCTTGGGGTTCGGCACAGAT

FLT1-Forward : TTTGCCTGAAATGGTGAGTAAGG

FLT1-Reverse : TGGTTTGCTTGAGCTGTGTTT

GAPDH-Forward : CAGAACATCATCCCTGCCTCTAC

GAPDH-Reverse : TTGAAGTCAGAGGAGACCACCTG

IL1B-Forward : ATGATGGCTTATTACAGTGGCAA

IL1B-Reverse : GTCGGAGATTCGTAGCTGGA

IL10-Forward : TCAAGGCGCATGTGAACTCC

IL10-Reverse : GATGTCAAACCTCACTCATGGCT

PGLYRP1-Forward : GTGGGCTACAACCTCCTGATTG

PGLYRP1-Reverse : TGGGGTTCCATAAGTGACCTG

TNFSF10-Forward : TCGTGCTGATCGTGATCTTC

TNFSF10-Reverse : GCTCGTTGGTAAAGTACACGTA

TNFRSF10D-Forward : GTTGGCTTTTCATGTCGGAAGA

TNFRSF10D-Reverse : CCCAGGAACTCGTGAAGGAC

TNFSF13B-Forward : GGGAGCAGTCACGCCTTAC

TNFSF13B-Reverse : GATCGGACAGAGGGGCTTT

TXNDC5-Forward : CTCTGGGCCTTGAACATT

TXNDC5-Reverse : CCCTCAGTGA CTCAA

TYMP-Forward : GGTGTGGGTGACAAGGTCAG

TYMP-Reverse : GCAGCACTTGCATCTGCTC

**Supplementary Figure 1.** Analysis of TXNDC5 expression in anti-TXNDC5 siRNA-transfected RASFs. (a) TXNDC5 mRNA expression was detected using real-time PCR (n=5). (b) TXNDC5 protein expression was detected using western blot analysis (n=5). (c) TXNDC5 protein expression levels were normalized against GAPDH expression levels. Allstars siRNA-transfected cells were used as controls. \* indicates  $p < 0.05$ , and \*\* indicates  $p < 0.01$ .

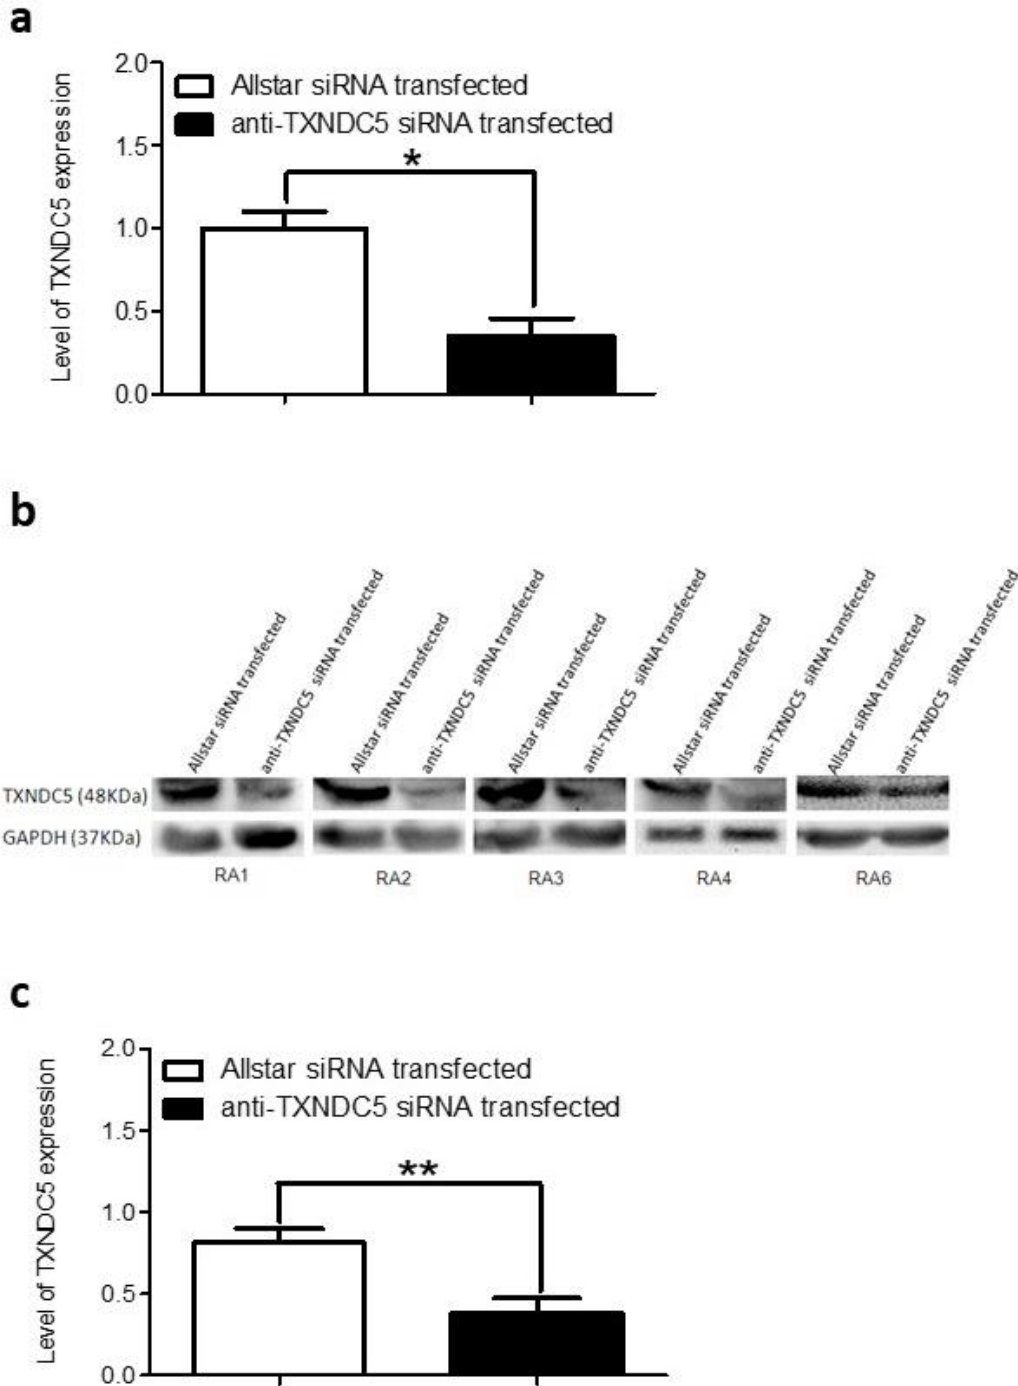

**Supplementary Figure 2.** Analysis of TXNDC5 expression in RASFs using real-time PCR. (a) TXNDC5 mRNA expression in RASFs (n=8) transfected with anti-TXNDC5 siRNA. (b) TXNDC5 mRNA expression in RASFs (n=5) transfected with TXNDC5-expressing plasmids. \*\*\* indicates  $p < 0.001$ .

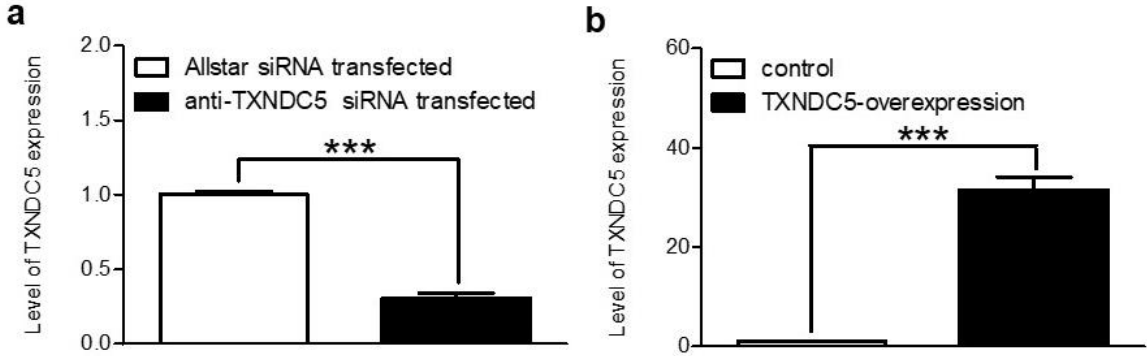

**Supplementary Table 2.** Raw data of PCR array analysis.

**Table 4-1. Signal Transduction PathwayFinder PCR Array**

| Layout | 1                             | 2                             | 3                               | 4                             | 5                               | 6                            | 7                                | 8                              | 9                              | 10                             | 11                             | 12                             |                                        |
|--------|-------------------------------|-------------------------------|---------------------------------|-------------------------------|---------------------------------|------------------------------|----------------------------------|--------------------------------|--------------------------------|--------------------------------|--------------------------------|--------------------------------|----------------------------------------|
| A      | ACSL3<br><b>-1.16</b><br>OKAY | ACSL4<br><b>-1.17</b><br>OKAY | ACSL5<br><b>1.55</b><br>OKAY    | ADM<br><b>-1.55</b><br>OKAY   | ARNT<br><b>-1.42</b><br>OKAY    | ATF4<br><b>1.05</b><br>OKAY  | AXIN2<br><b>-2.13</b><br>OKAY    | BAX<br><b>-1.56</b><br>OKAY    | BBC3<br><b>1.1</b><br>OKAY     | BCL2<br><b>-1.13</b><br>OKAY   | BCL2A1<br><b>3.42</b><br>OKAY  | BCL2L1<br><b>-1.08</b><br>OKAY | gene<br>expression level<br>evaluation |
| B      | BIRC3<br><b>1.41</b><br>OKAY  | BMP2<br><b>1.94</b><br>OKAY   | BMP4<br><b>-1.07</b><br>OKAY    | BTG2<br><b>-1.25</b><br>OKAY  | CA9<br><b>2.9</b><br>B          | CCL5<br><b>13.73</b><br>OKAY | CCND1<br><b>-1.13</b><br>OKAY    | CCND2<br><b>-3.09</b><br>OKAY  | CDKN1A<br><b>-1.33</b><br>OKAY | CDKN1B<br><b>-1.15</b><br>OKAY | CEBPD<br><b>-1.41</b><br>OKAY  | CPT2<br><b>-1.07</b><br>OKAY   | gene<br>expression level<br>evaluation |
| C      | CSF1<br><b>-1.06</b><br>OKAY  | DAB2<br><b>-1.67</b><br>OKAY  | EGFR<br><b>-1.27</b><br>OKAY    | EMP1<br><b>1.3</b><br>OKAY    | EPO<br><b>-1.7</b><br>B         | FABP1<br><b>-1.17</b><br>B   | FAS<br><b>-1.28</b><br>OKAY      | FCER2<br><b>1.02</b><br>C      | FOSL1<br><b>1.24</b><br>OKAY   | FTH1<br><b>-1.22</b><br>OKAY   | GADD45A<br><b>1.93</b><br>OKAY | GADD45B<br><b>1.3</b><br>OKAY  | gene<br>expression level<br>evaluation |
| D      | GATA3<br><b>-1</b><br>B       | GCLC<br><b>-1.13</b><br>OKAY  | GCLM<br><b>1.06</b><br>OKAY     | GSR<br><b>1.07</b><br>OKAY    | HERPUD1<br><b>-1.02</b><br>OKAY | HES1<br><b>1.75</b><br>OKAY  | HES5<br><b>1.19</b><br>B         | HEY1<br><b>1.01</b><br>B       | HEY2<br><b>-1.68</b><br>OKAY   | HEYL<br><b>1.26</b><br>B       | HMOX1<br><b>-1.59</b><br>OKAY  | ICAM1<br><b>1.11</b><br>OKAY   | gene<br>expression level<br>evaluation |
| E      | ID1<br><b>-1.31</b><br>OKAY   | IFNG<br><b>1.02</b><br>C      | IFRD1<br><b>-1.22</b><br>OKAY   | IRF1<br><b>2.35</b><br>OKAY   | JAG1<br><b>-1.55</b><br>OKAY    | LDHA<br><b>-1.23</b><br>OKAY | LFNG<br><b>-1.32</b><br>OKAY     | LRG1<br><b>-7.65</b><br>B      | MCL1<br><b>1.27</b><br>OKAY    | MMP7<br><b>-1.11</b><br>B      | MYC<br><b>1.37</b><br>OKAY     | NOTCH1<br><b>1.04</b><br>OKAY  | gene<br>expression level<br>evaluation |
| F      | NQO1<br><b>1.16</b><br>OKAY   | OLR1<br><b>-1.28</b><br>B     | PCNA<br><b>1.03</b><br>OKAY     | PPARD<br><b>-1.19</b><br>OKAY | PTCH1<br><b>-1.19</b><br>B      | RB1<br><b>1.08</b><br>OKAY   | SERPINE1<br><b>-1.15</b><br>OKAY | SLC27A4<br><b>-1.6</b><br>OKAY | SLC2A1<br><b>1.78</b><br>OKAY  | SOCS3<br><b>1.09</b><br>OKAY   | SORBS1<br><b>-1.42</b><br>A    | SQSTM1<br><b>-1.03</b><br>OKAY | gene<br>expression level<br>evaluation |
| G      | STAT1<br><b>2.51</b><br>OKAY  | TNF<br><b>1.65</b><br>B       | TNFSF10<br><b>16.36</b><br>OKAY | TXN<br><b>-1.12</b><br>OKAY   | TXNRD1<br><b>-1.23</b><br>OKAY  | VEGFA<br><b>2.11</b><br>OKAY | WISP1<br><b>-1.01</b><br>OKAY    | WNT1<br><b>1.02</b><br>C       | WNT2B<br><b>-1.01</b><br>OKAY  | WNT3A<br><b>1.02</b><br>C      | WNT5A<br><b>1.28</b><br>OKAY   | WNT6<br><b>1.02</b><br>C       | gene<br>expression level<br>evaluation |

**Table 4-2. Inflammatory Response & Autoimmunity PCR Array**

| Layout | 1                            | 2                           | 3                             | 4                            | 5                            | 6                            | 7                              | 8                            | 9                            | 10                           | 11                            | 12                           |                                        |
|--------|------------------------------|-----------------------------|-------------------------------|------------------------------|------------------------------|------------------------------|--------------------------------|------------------------------|------------------------------|------------------------------|-------------------------------|------------------------------|----------------------------------------|
| A      | BCL6<br><b>-1.51</b><br>OKAY | C3<br><b>-1.39</b><br>OKAY  | C3AR1<br><b>4.27</b><br>A     | CCL11<br><b>-3.95</b><br>B   | CCL13<br><b>1.87</b><br>OKAY | CCL16<br><b>2.09</b><br>B    | CCL17<br><b>-2.91</b><br>B     | CCL19<br><b>1.16</b><br>C    | CCL2<br><b>1.39</b><br>OKAY  | CCL21<br><b>1.36</b><br>B    | CCL22<br><b>1.16</b><br>C     | CCL23<br><b>-2.57</b><br>B   | gene<br>expression level<br>evaluation |
| B      | CCL24<br><b>1.16</b><br>C    | CCL3<br><b>1.04</b><br>OKAY | CCL4<br><b>-1.17</b><br>OKAY  | CCL5<br><b>10.59</b><br>OKAY | CCL7<br><b>4.37</b><br>OKAY  | CCL8<br><b>4.95</b><br>B     | CCR1<br><b>1.29</b><br>OKAY    | CCR2<br><b>18.92</b><br>B    | CCR3<br><b>1.54</b><br>OKAY  | CCR4<br><b>3.69</b><br>B     | CCR7<br><b>-1.09</b><br>OKAY  | CD14<br><b>-1.93</b><br>OKAY | gene<br>expression level<br>evaluation |
| C      | CD40<br><b>-1.25</b><br>OKAY | CD40LG<br><b>-2.71</b><br>B | CEBPB<br><b>-1.93</b><br>OKAY | CRP<br><b>1.16</b><br>C      | CSF1<br><b>-1.65</b><br>OKAY | CXCL1<br><b>1.43</b><br>OKAY | CXCL10<br><b>78.52</b><br>OKAY | CXCL2<br><b>1.49</b><br>OKAY | CXCL3<br><b>3.04</b><br>OKAY | CXCL5<br><b>4.91</b><br>OKAY | CXCL6<br><b>-1.18</b><br>OKAY | CXCL9<br><b>4.48</b><br>A    | gene<br>expression level<br>evaluation |

|   |                               |                               |                                |                              |                              |                              |                               |                                |                              |                              |                              |                                |                                        |
|---|-------------------------------|-------------------------------|--------------------------------|------------------------------|------------------------------|------------------------------|-------------------------------|--------------------------------|------------------------------|------------------------------|------------------------------|--------------------------------|----------------------------------------|
| D | CXCR1<br><b>1.16</b><br>C     | CXCR2<br><b>-1</b><br>B       | CXCR4<br><b>1.39</b><br>B      | FASLG<br><b>3.85</b><br>B    | FOS<br><b>-1.19</b><br>OKAY  | IFNG<br><b>1.33</b><br>B     | IL10<br><b>-3.98</b><br>B     | IL10RB<br><b>-1.77</b><br>OKAY | IL15<br><b>1.39</b><br>OKAY  | IL17A<br><b>1.16</b><br>C    | IL18<br><b>-2.29</b><br>A    | IL1A<br><b>-1.03</b><br>B      | gene<br>expression level<br>evaluation |
| E | IL1B<br><b>3.26</b><br>OKAY   | IL1R1<br><b>-3.17</b><br>OKAY | IL1RAP<br><b>-2.27</b><br>OKAY | IL1RN<br><b>7.44</b><br>OKAY | IL22<br><b>2.03</b><br>B     | IL23A<br><b>1.12</b><br>OKAY | IL23R<br><b>1.16</b><br>C     | IL5<br><b>-2.72</b><br>B       | IL6<br><b>1.2</b><br>OKAY    | IL6R<br><b>-1.66</b><br>OKAY | CXCL8<br><b>3.99</b><br>OKAY | IL9<br><b>1.16</b><br>C        | gene<br>expression level<br>evaluation |
| F | ITGB2<br><b>-2.31</b><br>OKAY | KNG1<br><b>1.26</b><br>B      | LTA<br><b>2.21</b><br>B        | LTB<br><b>-1.51</b><br>B     | LY96<br><b>-1.35</b><br>OKAY | MYD88<br><b>1.73</b><br>OKAY | NFKB1<br><b>-1.63</b><br>OKAY | NOS2<br><b>2.11</b><br>B       | NR3C1<br><b>-1.4</b><br>OKAY | PTGS2<br><b>3.46</b><br>OKAY | RIPK2<br><b>1.42</b><br>OKAY | SELE<br><b>1.16</b><br>C       | gene<br>expression level<br>evaluation |
| G | TIRAP<br><b>-2.37</b><br>OKAY | TLR1<br><b>-1.84</b><br>OKAY  | TLR2<br><b>3.37</b><br>A       | TLR3<br><b>3.04</b><br>OKAY  | TLR4<br><b>-2.09</b><br>OKAY | TLR5<br><b>-2.35</b><br>A    | TLR6<br><b>-1.76</b><br>OKAY  | TLR7<br><b>1.16</b><br>C       | TLR9<br><b>1.5</b><br>B      | TNF<br><b>1.52</b><br>B      | TNFSF14<br><b>1.16</b><br>C  | TOLLIP<br><b>-2.21</b><br>OKAY | gene<br>expression level<br>evaluation |

**Table 4-3. TNF Signaling Pathway PCR Array**

| Layout | 1                                     | 2                                    | 3                                    | 4                                     | 5                                  | 6                                     | 7                                    | 8                                 | 9                                 | 10                                  | 11                                | 12                               |                                        |
|--------|---------------------------------------|--------------------------------------|--------------------------------------|---------------------------------------|------------------------------------|---------------------------------------|--------------------------------------|-----------------------------------|-----------------------------------|-------------------------------------|-----------------------------------|----------------------------------|----------------------------------------|
| A      | AGFG1<br><b>1.08</b><br>OKAY          | ARHGDI B<br><b>-1.08</b><br>B        | BAG4<br><b>-1.24</b><br>OKAY         | CAD<br><b>-1.86</b><br>B              | CASP2<br><b>-1.01</b><br>OKAY      | CASP3<br><b>1.15</b><br>OKAY          | CASP8<br><b>1.33</b><br>OKAY         | CD27<br><b>-3.52</b><br>B         | CD40<br><b>1.38</b><br>OKAY       | CD40LG<br><b>-1.1</b><br>C          | CD70<br><b>1.07</b><br>OKAY       | CHUK<br><b>1.12</b><br>OKAY      | gene<br>expression level<br>evaluation |
| B      | CRADD<br><b>-1.62</b><br>A            | DFFA<br><b>-1.06</b><br>OKAY         | DUSP1<br><b>1.41</b><br>OKAY         | EDA2R<br><b>-1.31</b><br>OKAY         | FADD<br><b>-1.13</b><br>OKAY       | FAS<br><b>-1.05</b><br>OKAY           | FASLG<br><b>1.25</b><br>B            | IKBKAP<br><b>-1.05</b><br>OKAY    | IKBKB<br><b>1.23</b><br>OKAY      | IKBKG<br><b>-1.05</b><br>OKAY       | JUN<br><b>1.52</b><br>OKAY        | LMNA<br><b>-1.29</b><br>OKAY     | gene<br>expression level<br>evaluation |
| C      | LMNB1<br><b>1.19</b><br>OKAY          | LMNB2<br><b>1.05</b><br>OKAY         | LTA<br><b>-2.27</b><br>B             | LTB<br><b>2.15</b><br>B               | LTBR<br><b>-1.1</b><br>OKAY        | MADD<br><b>-1.03</b><br>OKAY          | MAP2K4<br><b>-1.14</b><br>OKAY       | MAP3K1<br><b>-1.24</b><br>OKAY    | MAP3K7<br><b>-1.14</b><br>OKAY    | MAPK8<br><b>-1.04</b><br>OKAY       | NFKB1<br><b>-1.03</b><br>OKAY     | NFKBIA<br><b>1.56</b><br>OKAY    | gene<br>expression level<br>evaluation |
| D      | NGFR<br><b>-1.97</b><br>B             | PAK1<br><b>1.03</b><br>OKAY          | PAK2<br><b>-1.02</b><br>OKAY         | PARP1<br><b>-1</b><br>OKAY            | PGLYRP1<br><b>4.94</b><br>B        | PRKDC<br><b>1.15</b><br>OKAY          | PSMG2<br><b>-1.05</b><br>OKAY        | RB1<br><b>1.26</b><br>OKAY        | RELT<br><b>1.31</b><br>OKAY       | SPTAN1<br><b>-1.22</b><br>OKAY      | TNF<br><b>1.79</b><br>B           | TNFAIP3<br><b>2.75</b><br>OKAY   | gene<br>expression level<br>evaluation |
| E      | TNFRSF1<br>0A<br><b>-1.09</b><br>OKAY | TNFRSF1<br>0B<br><b>1.07</b><br>OKAY | TNFRSF1<br>0C<br><b>1.44</b><br>OKAY | TNFRSF1<br>0D<br><b>-2.83</b><br>OKAY | TNFRSF1<br>1A<br><b>-1.01</b><br>B | TNFRSF1<br>1B<br><b>-1.12</b><br>OKAY | TNFRSF1<br>2A<br><b>1.05</b><br>OKAY | TNFRSF1<br>3B<br><b>-1.1</b><br>C | TNFRSF1<br>3C<br><b>1.15</b><br>B | TNFRSF1<br>4<br><b>1.59</b><br>OKAY | TNFRSF1<br>7<br><b>-1.89</b><br>B | TNFRSF1<br>8<br><b>1.78</b><br>B | gene<br>expression level<br>evaluation |
| F      | TNFRSF1<br>9<br><b>-1.61</b><br>OKAY  | TNFRSF1<br>A<br><b>-1.2</b><br>OKAY  | TNFRSF1<br>B<br><b>1.53</b><br>OKAY  | TNFRSF2<br>1<br><b>1.03</b><br>OKAY   | TNFRSF2<br>5<br><b>-1.47</b><br>B  | TNFRSF4<br><b>-1.1</b><br>C           | TNFRSF6<br>B<br><b>-1.03</b><br>OKAY | TNFRSF8<br><b>-1.11</b><br>B      | TNFRSF9<br><b>-1.48</b><br>B      | TNFSF10<br><b>21.52</b><br>OKAY     | TNFSF11<br><b>1.62</b><br>B       | TNFSF12<br><b>-1.38</b><br>OKAY  | gene<br>expression level<br>evaluation |
| G      | TNFSF13<br><b>1.31</b><br>B           | TNFSF13<br>B<br><b>11.1</b><br>OKAY  | TNFSF14<br><b>3.4</b><br>B           | TNFSF15<br><b>-1.11</b><br>OKAY       | TNFSF18<br><b>6.08</b><br>B        | TNFSF4<br><b>1.46</b><br>B            | TNFSF8<br><b>1.11</b><br>B           | TNFSF9<br><b>1.54</b><br>OKAY     | TRADD<br><b>1.01</b><br>OKAY      | TRAF1<br><b>-1.11</b><br>OKAY       | TRAF2<br><b>-1.02</b><br>OKAY     | TRAF3<br><b>-1.23</b><br>OKAY    | gene<br>expression level<br>evaluation |

**Table 4-4. Angiogenesis PCR array**

| Layout | 1                              | 2                             | 3                              | 4                             | 5                               | 6                                | 7                                | 8                             | 9                             | 10                            | 11                              | 12                            |                                        |
|--------|--------------------------------|-------------------------------|--------------------------------|-------------------------------|---------------------------------|----------------------------------|----------------------------------|-------------------------------|-------------------------------|-------------------------------|---------------------------------|-------------------------------|----------------------------------------|
| A      | AKT1<br><b>1.37</b><br>OKAY    | ANG<br><b>-1.32</b><br>OKAY   | ANGPT1<br><b>-1.38</b><br>OKAY | ANGPT2<br><b>1.13</b><br>B    | ANGPTL4<br><b>-1.58</b><br>OKAY | ANPEP<br><b>1.31</b><br>OKAY     | ADGRB1<br><b>-1.75</b><br>B      | CCL11<br><b>-4.27</b><br>B    | CCL2<br><b>2.51</b><br>OKAY   | CDH5<br><b>-1.22</b><br>OKAY  | COL18A1<br><b>-1.34</b><br>OKAY | COL4A3<br><b>-1.7</b><br>B    | gene<br>expression level<br>evaluation |
| B      | CTGF<br><b>-1.59</b><br>OKAY   | CXCL1<br><b>2.05</b><br>OKAY  | CXCL10<br><b>86.43</b><br>OKAY | CXCL5<br><b>6.08</b><br>OKAY  | CXCL6<br><b>1.52</b><br>OKAY    | CXCL9<br><b>5.34</b><br>A        | EDN1<br><b>-1.23</b><br>OKAY     | EFNA1<br><b>-1.02</b><br>B    | EFNB2<br><b>-1.33</b><br>OKAY | EGF<br><b>1.38</b><br>OKAY    | ENG<br><b>-1.17</b><br>OKAY     | EPHB4<br><b>-1.84</b><br>OKAY | gene<br>expression level<br>evaluation |
| C      | ERBB2<br><b>-1.44</b><br>OKAY  | F3<br><b>2.75</b><br>OKAY     | FGF1<br><b>-1.01</b><br>OKAY   | FGF2<br><b>-1.08</b><br>OKAY  | FGFR3<br><b>-2.13</b><br>A      | FIGF<br><b>1.3</b><br>B          | FLT1<br><b>4.04</b><br>B         | FN1<br><b>-1.21</b><br>OKAY   | HGF<br><b>-1.23</b><br>OKAY   | HIF1A<br><b>-1.15</b><br>OKAY | HPSE<br><b>-1</b><br>OKAY       | ID1<br><b>-1.35</b><br>OKAY   | gene<br>expression level<br>evaluation |
| D      | IFNA1<br><b>-1.08</b><br>B     | IFNG<br><b>-1.08</b><br>B     | IGF1<br><b>-2.57</b><br>OKAY   | IL1B<br><b>4.66</b><br>OKAY   | IL6<br><b>1.5</b><br>OKAY       | CXCL8<br><b>4.88</b><br>OKAY     | ITGAV<br><b>-2.11</b><br>OKAY    | ITGB3<br><b>1.29</b><br>OKAY  | JAG1<br><b>-1.52</b><br>OKAY  | KDR<br><b>1.68</b><br>B       | LECT1<br><b>1.17</b><br>C       | LEP<br><b>-1.38</b><br>B      | gene<br>expression level<br>evaluation |
| E      | MDK<br><b>2.73</b><br>OKAY     | MMP14<br><b>-1.59</b><br>OKAY | MMP2<br><b>-1.68</b><br>OKAY   | MMP9<br><b>-1.11</b><br>OKAY  | NOS3<br><b>1.17</b><br>C        | NOTCH4<br><b>-1.03</b><br>OKAY   | NRP1<br><b>-1.14</b><br>OKAY     | NRP2<br><b>-1.74</b><br>OKAY  | PDGFA<br><b>1.07</b><br>OKAY  | PECAM1<br><b>1.22</b><br>B    | PF4<br><b>3.07</b><br>OKAY      | PGF<br><b>1.09</b><br>OKAY    | gene<br>expression level<br>evaluation |
| F      | PLAU<br><b>-2.08</b><br>OKAY   | PLG<br><b>1.17</b><br>C       | PROK2<br><b>1.17</b><br>C      | PTGS1<br><b>-1.66</b><br>OKAY | S1PR1<br><b>-1.41</b><br>OKAY   | SERPINE1<br><b>-1.17</b><br>OKAY | SERPINF1<br><b>-1.47</b><br>OKAY | SPHK1<br><b>-1.08</b><br>OKAY | TEK<br><b>-1.37</b><br>OKAY   | TGFA<br><b>1.21</b><br>B      | TGFB1<br><b>-1.14</b><br>OKAY   | TGFB2<br><b>-1.11</b><br>OKAY | gene<br>expression level<br>evaluation |
| G      | TGFBR1<br><b>-2.02</b><br>OKAY | THBS1<br><b>1.16</b><br>OKAY  | THBS2<br><b>-2.27</b><br>OKAY  | TIE1<br><b>3.04</b><br>B      | TIMP1<br><b>-1.01</b><br>OKAY   | TIMP2<br><b>-1.48</b><br>OKAY    | TIMP3<br><b>-1.42</b><br>OKAY    | TNF<br><b>2.57</b><br>B       | TYMP<br><b>4.6</b><br>OKAY    | VEGFA<br><b>2.37</b><br>OKAY  | VEGFB<br><b>-1.24</b><br>OKAY   | VEGFC<br><b>1.77</b><br>OKAY  | gene<br>expression level<br>evaluation |

**Supplementary Figure 3.** Real-time PCR analysis of C3AR1, CCL7, CCL8, CCL11, CCR2, CXCL9, CXCL10, FLT1, IL10, PGLYRP1, TNFSF10, TNFRSF10D and TNFSF13B mRNA levels in RASFs transfected with anti-TXNDC5 siRNA. The expression levels of the above target genes in RASFs with transfection of Allstars siRNA (hollow box) were set as “1”, and the expression of these target genes in RASFs transfected with anti-TXNDC5 siRNA (solid box) were normalized to the expression of the corresponding genes in the controls. When RASFs were transfected with TXNDC5-expressing plasmids, the expression levels of the above target genes in the blank plasmid-transfected RASFs (left twill) were set as “1”, and expression levels of these target genes in RASFs transfected with TXNDC5-expressing plasmids (right twill) were normalized to expression levels of the corresponding genes in the controls. The data are presented as the mean  $\pm$  SD. \* indicates  $p < 0.05$ , \*\* indicates  $p < 0.01$ , and \*\*\* indicates  $p < 0.001$ .



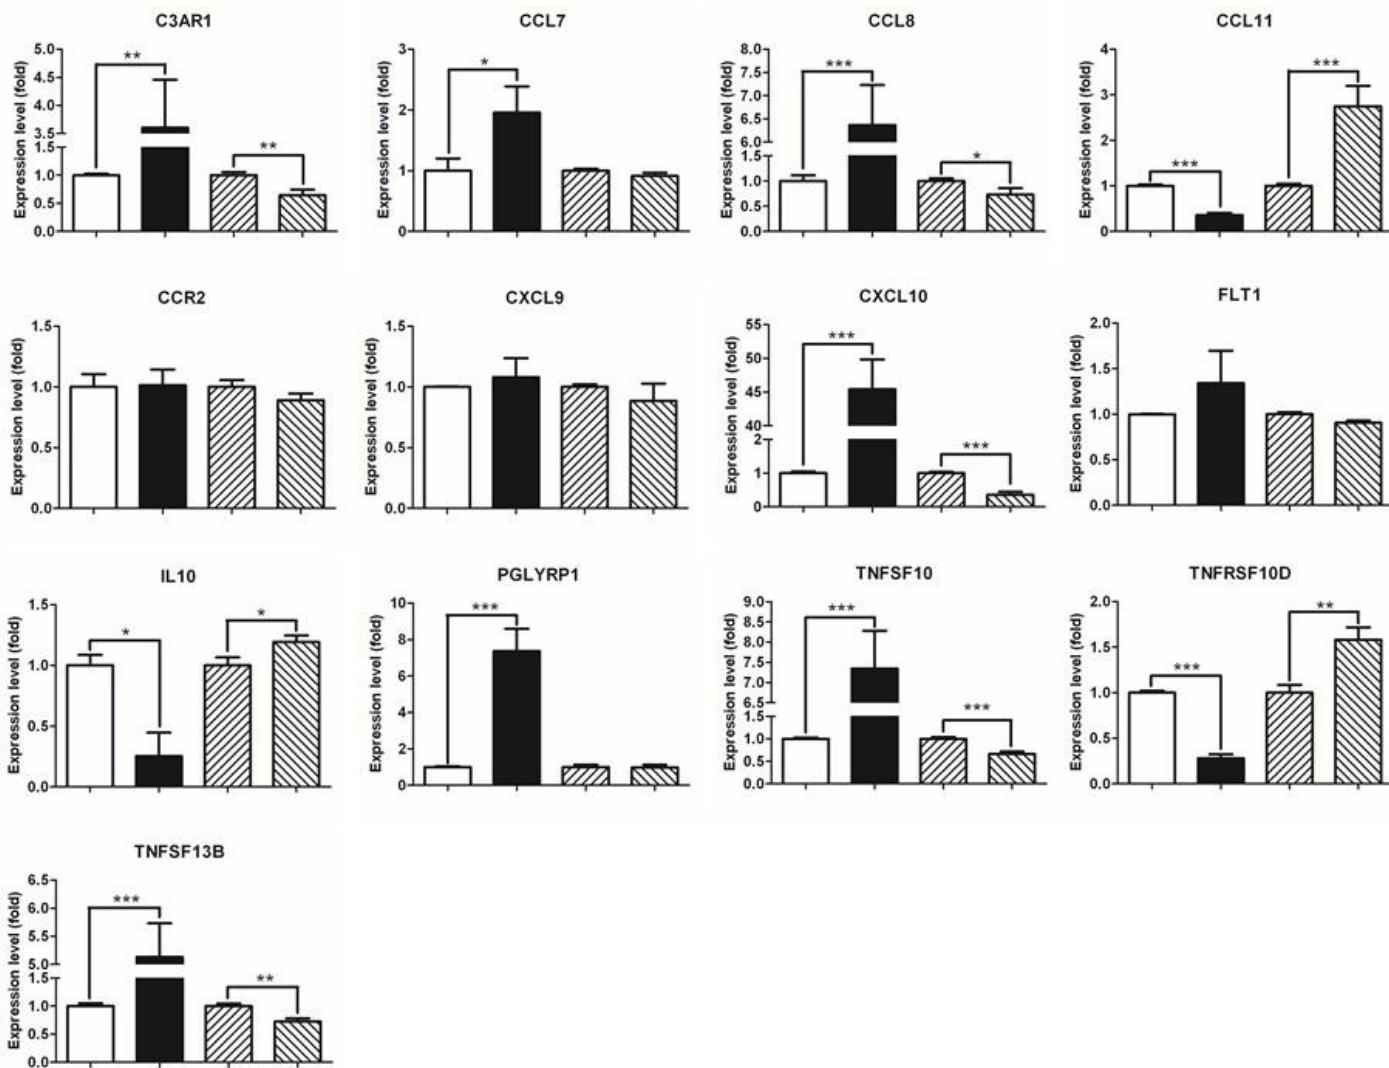

Supplement: 170170_Data_Suppl.pdf [file 170170_Data_Suppl.pdf]
